# Supplementary material
Source: MDPI journal article supplement (https://www.mdpi.com/2071-1050/10/3/738)
Supplement: s1 [file s1]

## Supplementary Material to Article

# Characterization of the Cradle to Cradle Certified™ Program in the Context of Eco-labels and Environmental Declarations

Nikolay Minkov <sup>1,\*</sup>, Vanessa Bach <sup>1</sup> and Matthias Finkbeiner <sup>1</sup>

<sup>1</sup> Technische Universität Berlin, Germany

\* Correspondence: [nikolay.minkov@tu-berlin.de](mailto:nikolay.minkov@tu-berlin.de); Tel.: +49 30 314 28 517

**Table S1.** Description of the attributes and their features of the adopted eco-label characterization scheme applied in the article based on Minkov et al. [1]

| Attribute and features                                                                                                  | Description                                                                                                                                                                                                                                                     |
|-------------------------------------------------------------------------------------------------------------------------|-----------------------------------------------------------------------------------------------------------------------------------------------------------------------------------------------------------------------------------------------------------------|
| <b>Communication characteristics</b>                                                                                    |                                                                                                                                                                                                                                                                 |
| 1 ISO Typology<br>Type I<br>Type II<br>Type III<br>Undefined                                                            | Defines to which typology from the categorization of the ISO 14020 series a label <sup>1</sup> is assigned.                                                                                                                                                     |
| 2 Awarding format<br>Seal<br>Rating (non-sealed)<br>Rating (sealed)<br>Declaration (non-sealed)<br>Declaration (sealed) | Defines the level of information that the consumer receives through a label. A seal provides a simple binary pass–fail information. A rating demonstrates a level of superiority. A declaration provides quantified information in a preset list of categories. |
| 3 Multiplicity of covered aspects<br>Single-aspect<br>Multi-aspect                                                      | Defines whether a label cover one or multiple aspects.                                                                                                                                                                                                          |
| 4 Aspects diversity<br>Environmental<br>Social<br>Health                                                                | Defines whether a label covers additional aspects different from environmental (e.g. social and/or health).                                                                                                                                                     |
| 5 End-user focus<br>Business-to-consumer<br>Business-to-business<br>Both                                                | Defines the audience to which a label is focused. The end-user focus could be an important factor for the selection of e.g. the awarding format.                                                                                                                |
| <b>Scope</b>                                                                                                            |                                                                                                                                                                                                                                                                 |
| 6 Sector scope<br>Sector-specific<br>Multi-sectorial                                                                    | Defines whether a label covers products from only one specific sector or multiple sectors. In the latter case, awarding criteria are usually developed for each product group individually.                                                                     |
| 7 Operation scope<br>Product<br>Production process/<br>method<br>Organization                                           | Defines whether a label characterizes a property of the product or a step of or the whole production process, or an achievement of an organization.                                                                                                             |
| 8 Geographic scope<br>National                                                                                          | Defines the scope in geographical terms to which a label spreads out (i.e. is being recognized and its awarding criteria                                                                                                                                        |

|                                                                                                                          |                                                                                                                                                                                                                                                                                                                                                                                                                                                                                      |
|--------------------------------------------------------------------------------------------------------------------------|--------------------------------------------------------------------------------------------------------------------------------------------------------------------------------------------------------------------------------------------------------------------------------------------------------------------------------------------------------------------------------------------------------------------------------------------------------------------------------------|
| Regional<br>International                                                                                                | are valid).                                                                                                                                                                                                                                                                                                                                                                                                                                                                          |
| 9 Awarding criteria scope<br>Product-specific<br>Generic                                                                 | Defines whether the awarding criteria are product-specific or generic (i.e. apply equally to all products under certification).                                                                                                                                                                                                                                                                                                                                                      |
| 10 Materiality principle<br>Yes<br>Neutral<br>No                                                                         | Defines whether the awarding criteria of a label focus on the key performance characteristics of the product. This attribute is closely related to the Awarding criteria scope.                                                                                                                                                                                                                                                                                                      |
| 11 Life cycle (LC) perspective<br>Non-LC based<br>LC based<br>LCA based                                                  | Defines the level of a product's life cycle perspective considered in the awarding criteria of a label. Non-LC based ones usually consider only a single stage or attribute of the product. LC based ones require only a qualitative LC screening of a product under consideration, whereas the analysis is undertaken on particular LC stage(s) only. LCA-based labels consider all of the relevant environmental aspects of a product and require full conformance with ISO 14040. |
| <b>Standard characteristics</b>                                                                                          |                                                                                                                                                                                                                                                                                                                                                                                                                                                                                      |
| 12 Compulsoriness<br>Voluntary<br>Mandatory                                                                              | Defines whether the application and use of a label is voluntary or mandatory.                                                                                                                                                                                                                                                                                                                                                                                                        |
| 13 Financing <sup>2</sup><br>Fees and/or member dues<br>Governmental subsidies<br>Industry funding<br>Donations<br>Other | Defines the source or the combination of sources that a label uses for funding.                                                                                                                                                                                                                                                                                                                                                                                                      |
| 14 Purpose<br>Ideals-centric<br>Adversity-centric<br>Neutral                                                             | Defines the purpose of a label. An ideals-centric label serves as a benchmark of achieving certain ideals or excellence. An adversity-centric label serves at the bottom line to show the avoidance of certain adversities, e.g. a "chlorine-free paper" label. A neutral is a declaration type of label.                                                                                                                                                                            |
| 15 Longevity<br>Single-issued<br>Renewable<br>Improvement-based                                                          | Defines the format of expiration of a label. A single-issued label is issued once, and is never a subject of further verification again. A renewable label can be revised and reissued after expiration or after change in rules or in system elements. A reduction-based label requires a demonstration of improved performance on a regular basis in order to be recertified.                                                                                                      |
| <b>Governance characteristics</b>                                                                                        |                                                                                                                                                                                                                                                                                                                                                                                                                                                                                      |
| 16 Governance<br>Governmental<br>Quasi-governmental<br>Private (PFP, NPO, NGO)                                           | Defines the type of governance of a label. A quasi-governmental label is such initiated by a government, but managed by a private company. A private label can be managed by private for profits (PFP), private for non-profits (NPO) or non-governmental organizations (NGO).                                                                                                                                                                                                       |
| 17 Verification<br>First party<br>Second party<br>Third party                                                            | Defines the approach to confirmation that all criteria and requirements of a label are met. First-party verification is performed by the organization that applies for the label itself. Second-party verification is done by the labeling program. Third-party verification is performed by an independent third-party verification body that could be internal or external to the applicant.                                                                                       |
| 18 Awarding criteria revision                                                                                            | Defines whether a label sets rules for revision of the awarding                                                                                                                                                                                                                                                                                                                                                                                                                      |

|                                                                                                     |                                                                                                                                                                                                |
|-----------------------------------------------------------------------------------------------------|------------------------------------------------------------------------------------------------------------------------------------------------------------------------------------------------|
| Yes, regularly<br>Yes, randomly<br>No                                                               | criteria.                                                                                                                                                                                      |
| 19 Stakeholder involvement<br>Low<br>Medium<br>High                                                 | Evaluates the level of involvement of stakeholders in the process of labeling program setting and update, or during the process of definition of a new product group and/or awarding criteria. |
| <b>Conclusive characteristics</b>                                                                   |                                                                                                                                                                                                |
| 20 Transparency <sup>3</sup><br>Label-setting process<br>Awardees<br>Funding<br>Verification report | Evaluates the level of transparency (i.e. access to information) of a label regarding the listed features (answered with <i>yes</i> for transparent and with <i>no</i> for non-transparent).   |
| 21 Comparability<br>Low<br>Medium<br>High                                                           | Evaluates the level of comparability that a label allows between certified products themselves and between awarded and non-awarded products from the same product category.                    |
| 22 Environmental excellence<br>Intended<br>Not intended<br>Possible                                 | Defines whether the setting of a label is intended to promote environmental excellence through certification.                                                                                  |

<sup>1</sup> A label here is used as a generalization for an environmental label, eco-label, or environmental product declaration.

<sup>2</sup> The evaluation of this attribute could result as a sum of two or more features.

<sup>3</sup> The features of this attribute are evaluated individually.

## References

1. Minkov, N.; Lehmann, A.; Winter, L.; Finkbeiner, M. Characterization of environmental labels beyond the criteria of ISO 14020-series. *Manuscript submitted for publication* **2018**.

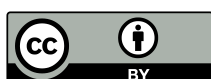

© 2018 by the authors. Submitted for possible open access publication under the terms and conditions of the Creative Commons Attribution (CC-BY) license (<http://creativecommons.org/licenses/by/4.0/>).
